# Supplementary material for: Myonuclear accretion is a determinant of exercise-induced remodeling in skeletal muscle
Source: eLife journal article supplement (doi:10.7554/elife.44876), 2019-04-23
Supplement: supp [file elife-44876-supp-v1.zip]

Archive with 5 entries (5 files):
- elife_poa_e44876_Figure_3_figure_supplement_1.jpg
- elife_poa_e44876_Transparent_Reporting_File.pdf
- elife_poa_e44876_Figure_2_figure_supplement_1.jpg
- elife_poa_e44876_Figure_3_figure_supplement_2.jpg
- elife_poa_e44876_Figure_5_figure_supplement_1.jpg
