# Supplementary figures and images for: Myonuclear accretion is a determinant of exercise-induced remodeling in skeletal muscle
Source: eLife journal article supplement (doi:10.7554/elife.44876), 2019-04-23

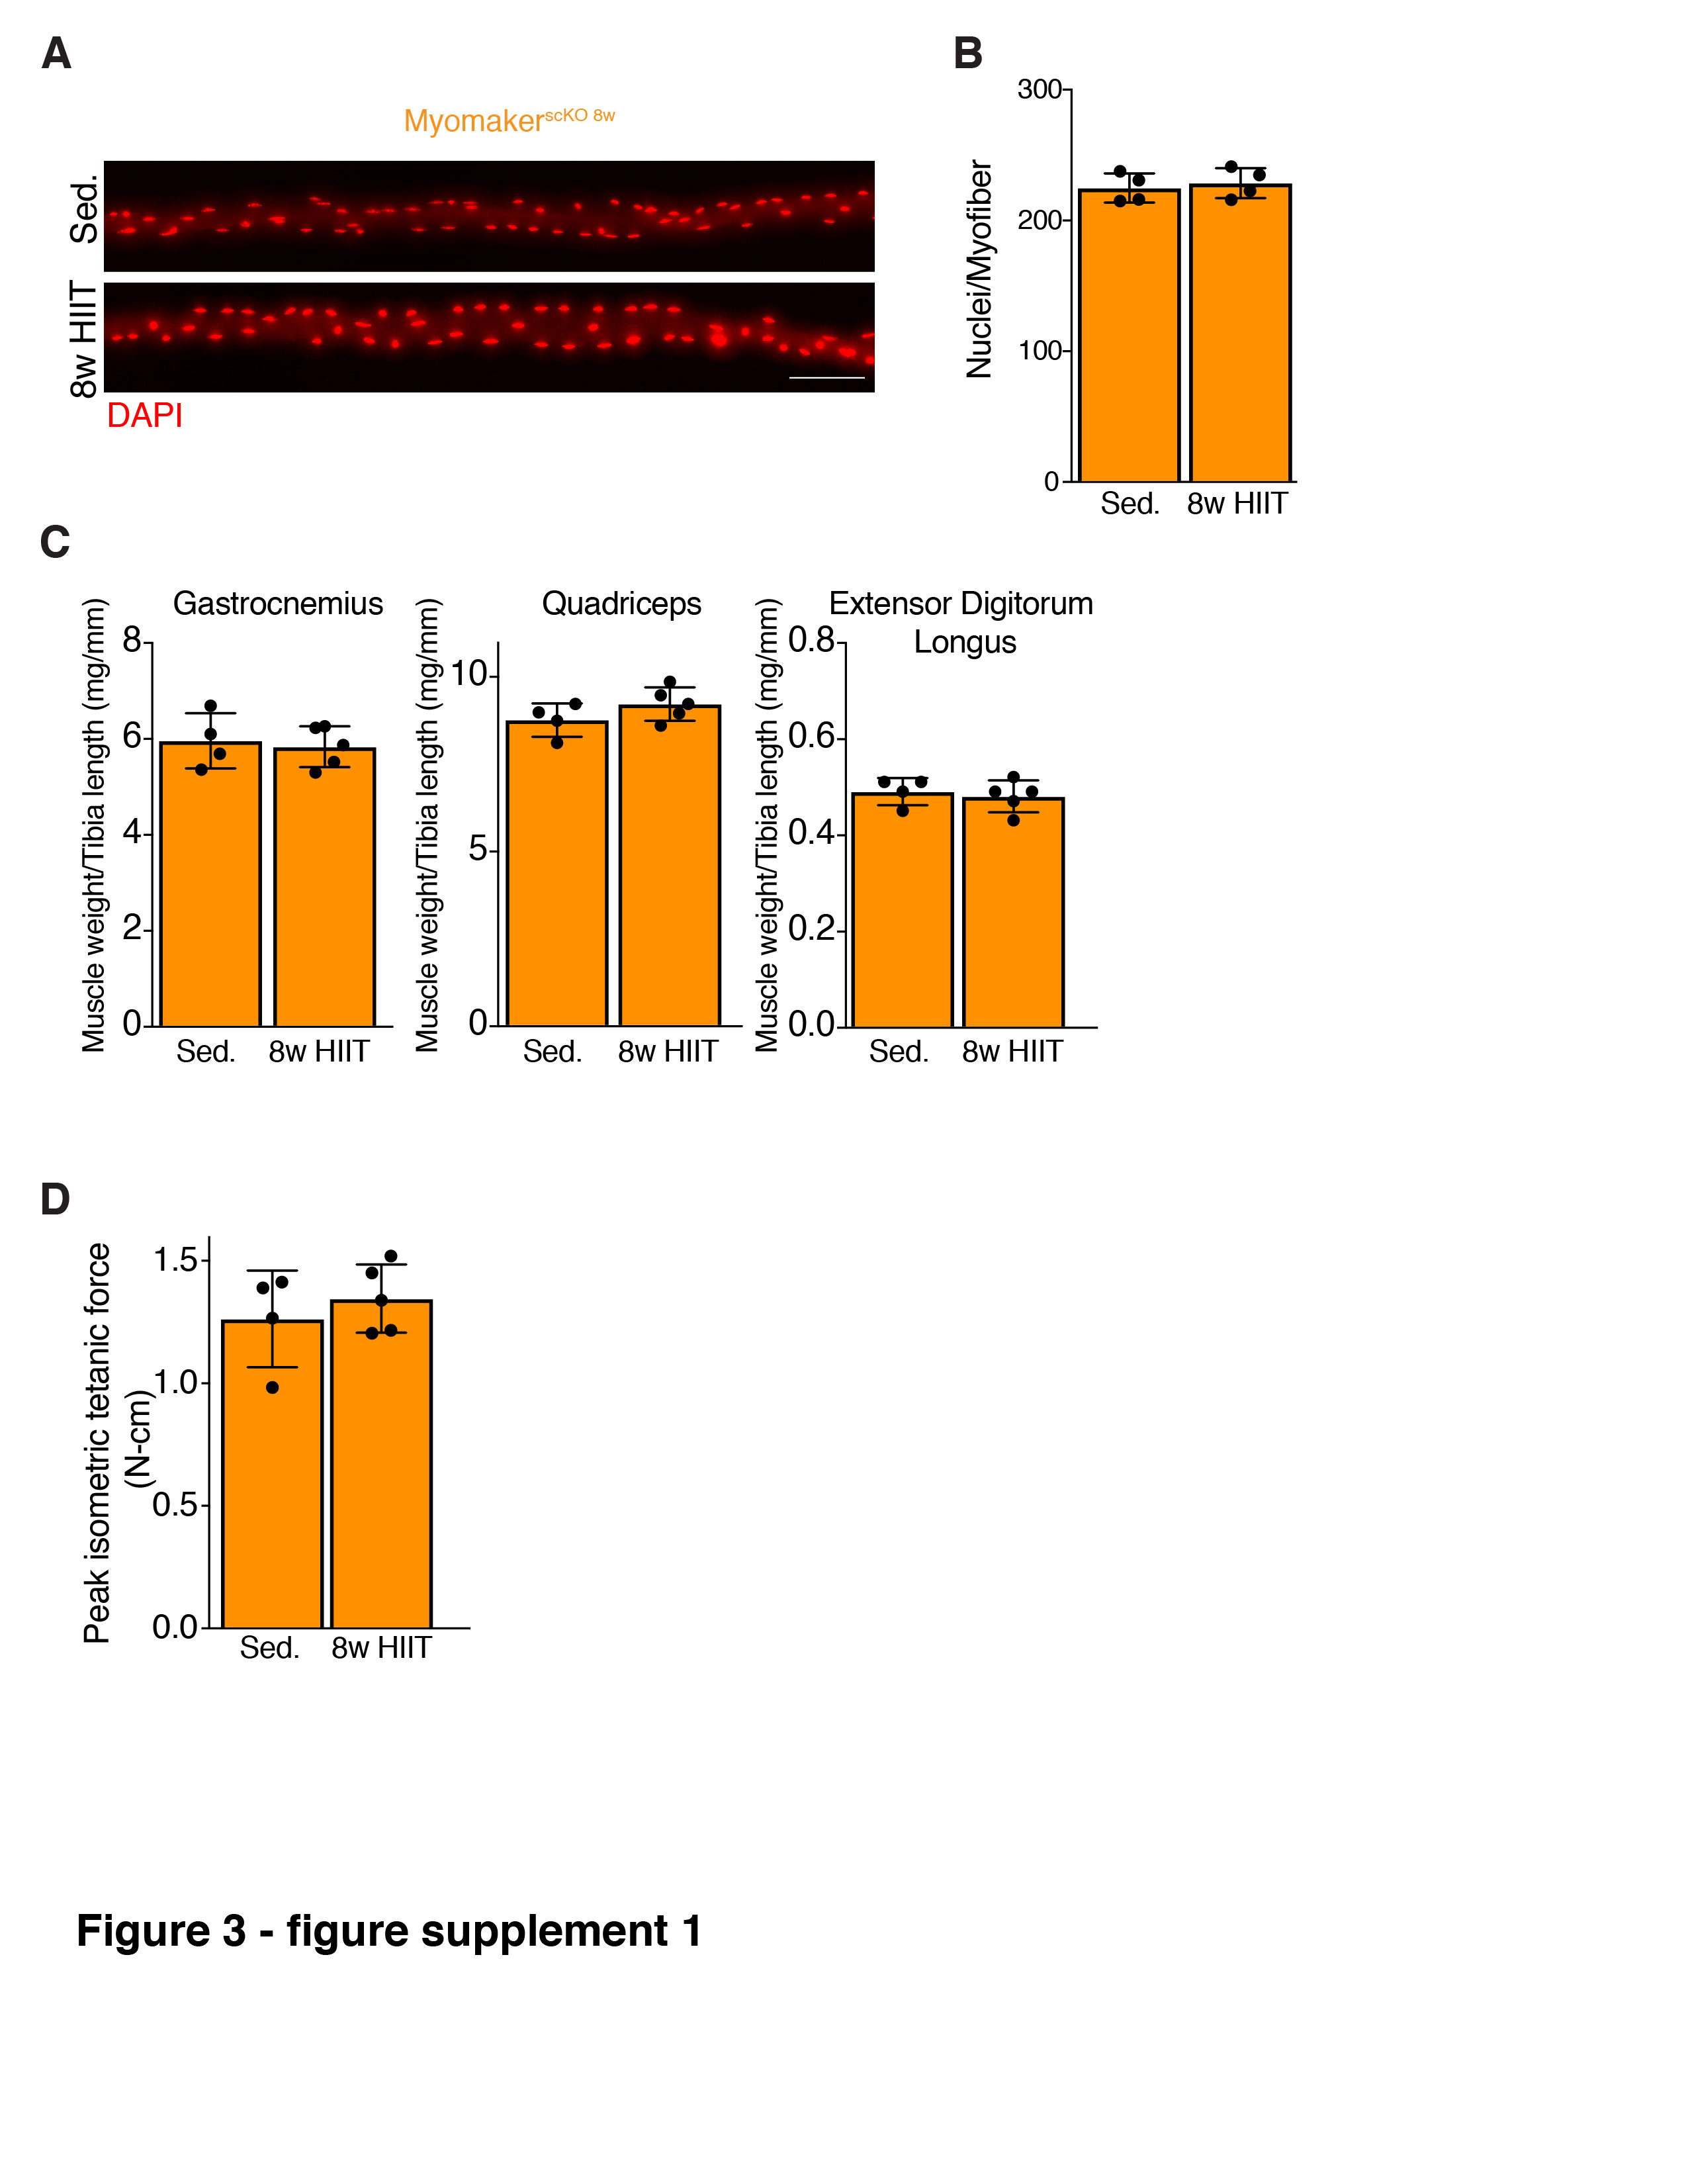

Supplement: supp [file elife-44876-supp-v1.zip › elife_poa_e44876_Figure_3_figure_supplement_1.jpg]

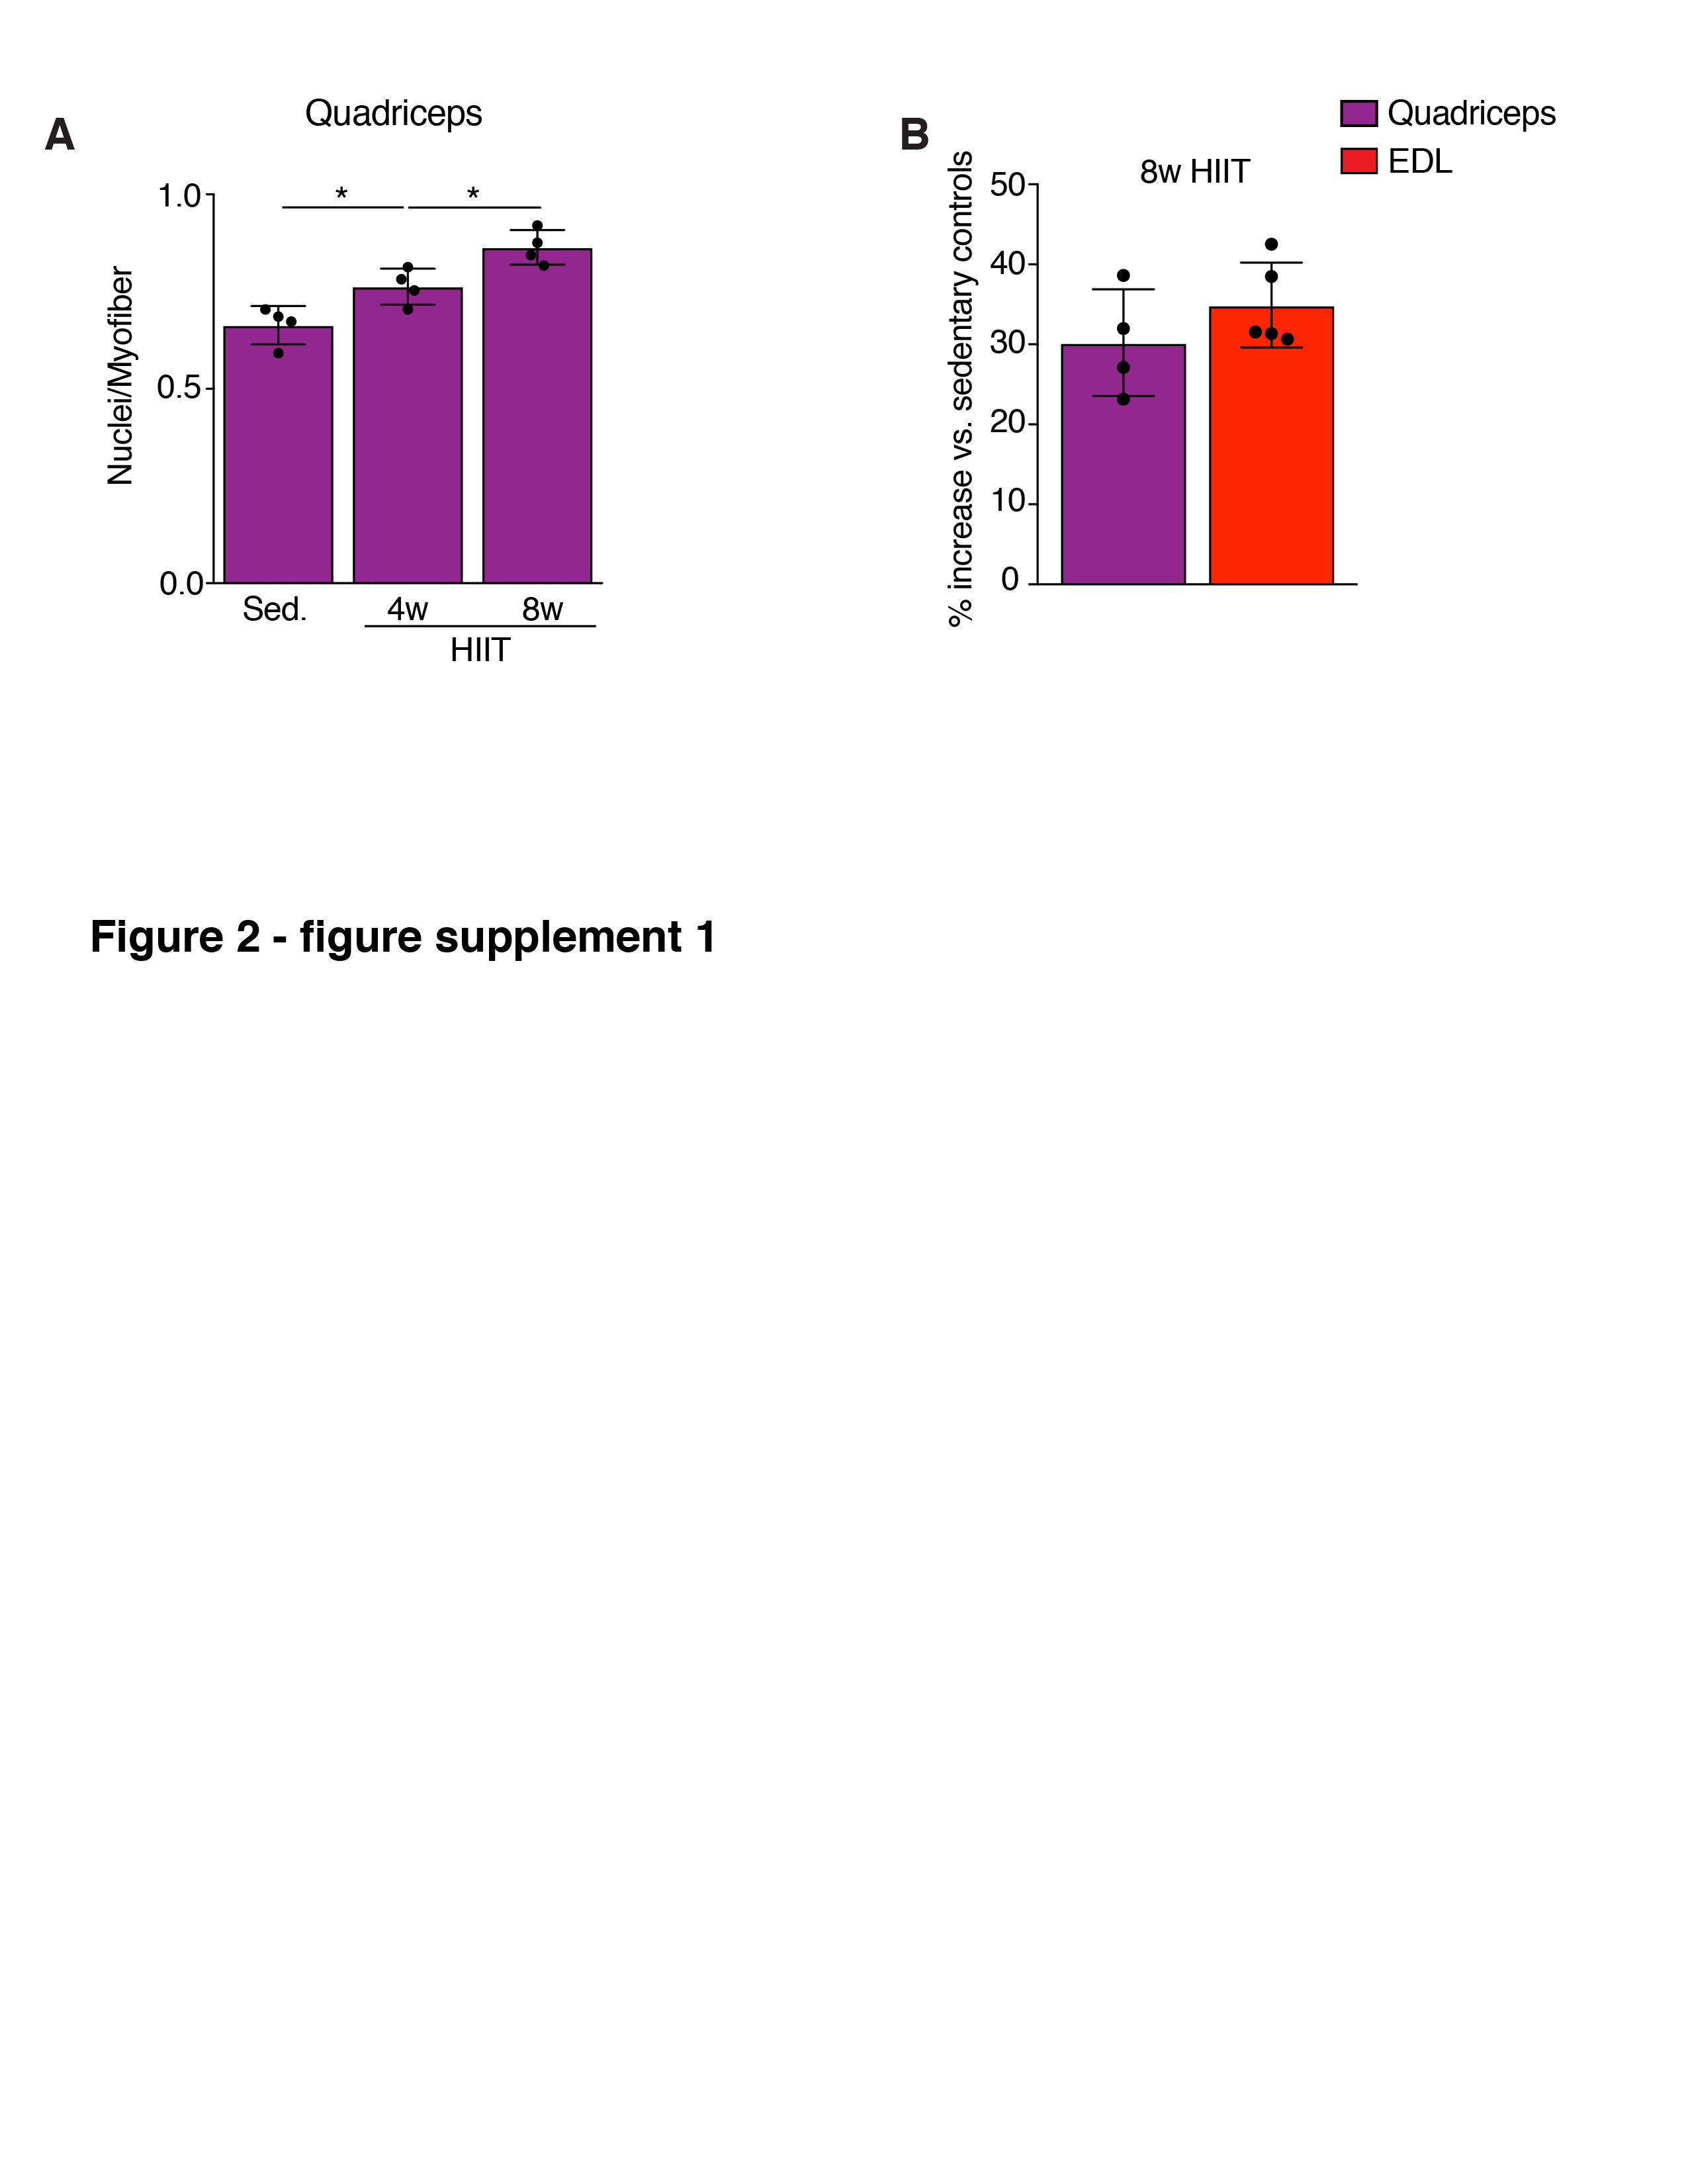

Supplement: supp [file elife-44876-supp-v1.zip › elife_poa_e44876_Figure_2_figure_supplement_1.jpg]

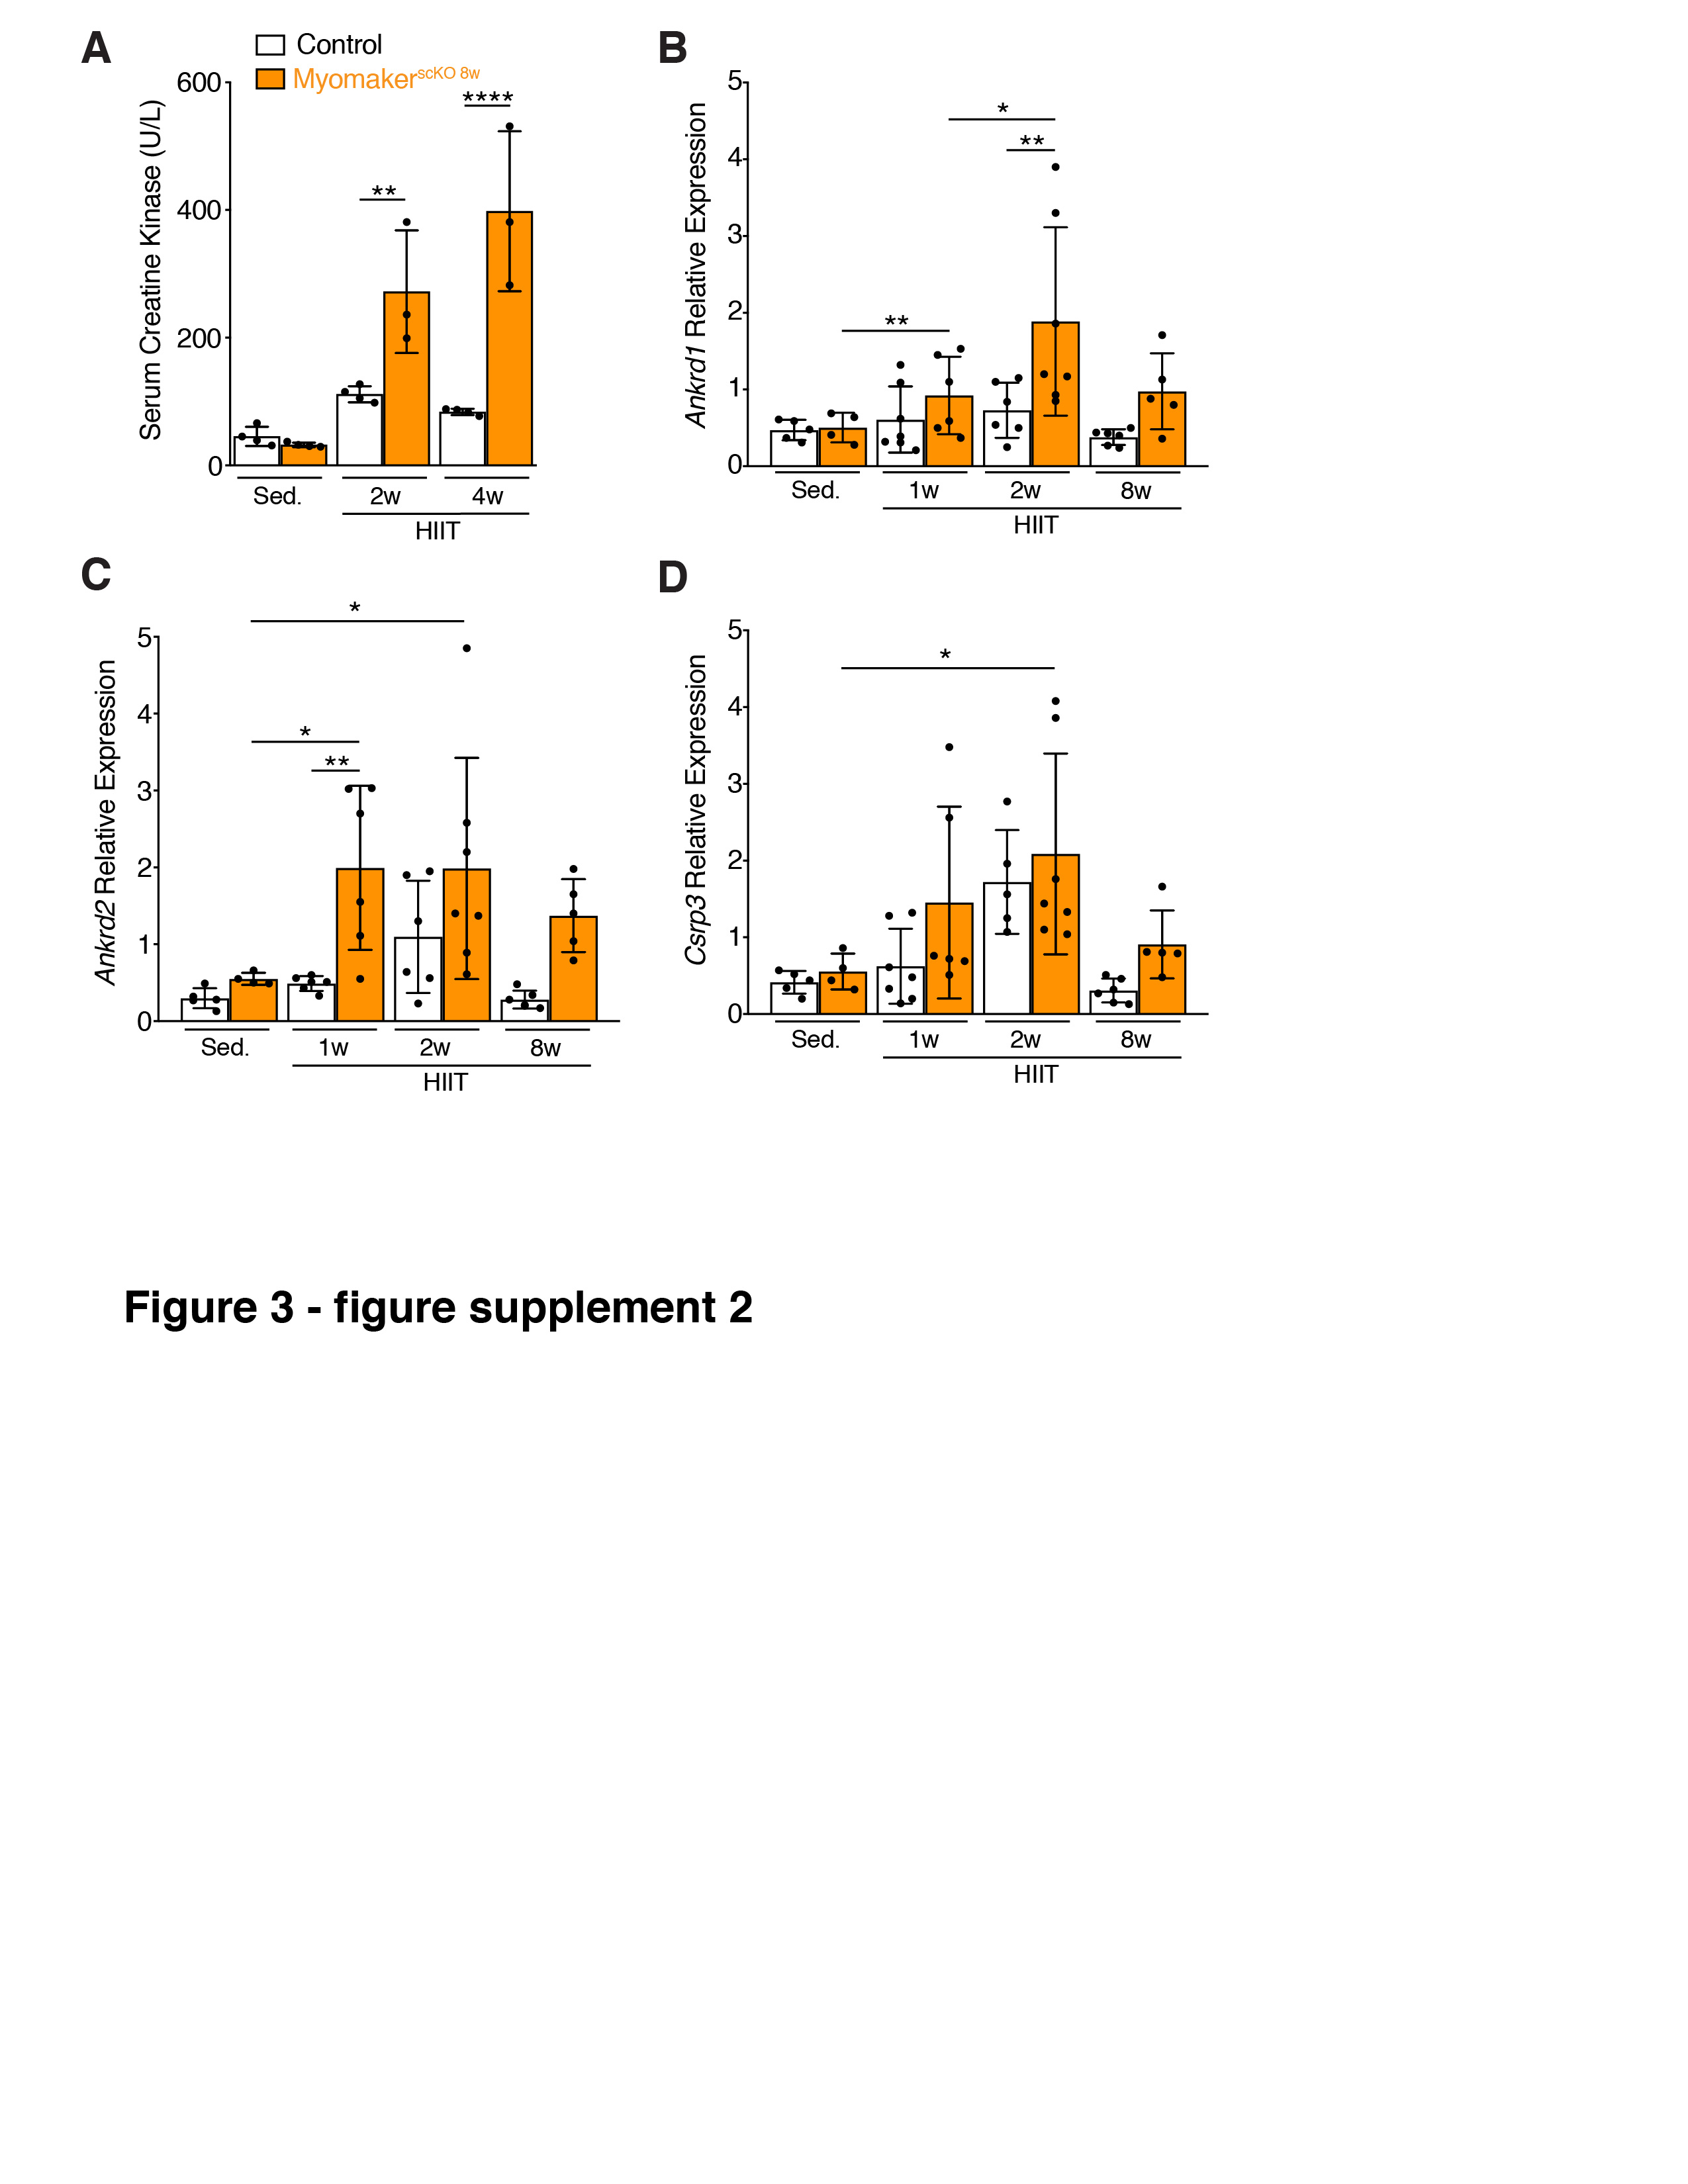

Supplement: supp [file elife-44876-supp-v1.zip › elife_poa_e44876_Figure_3_figure_supplement_2.jpg]

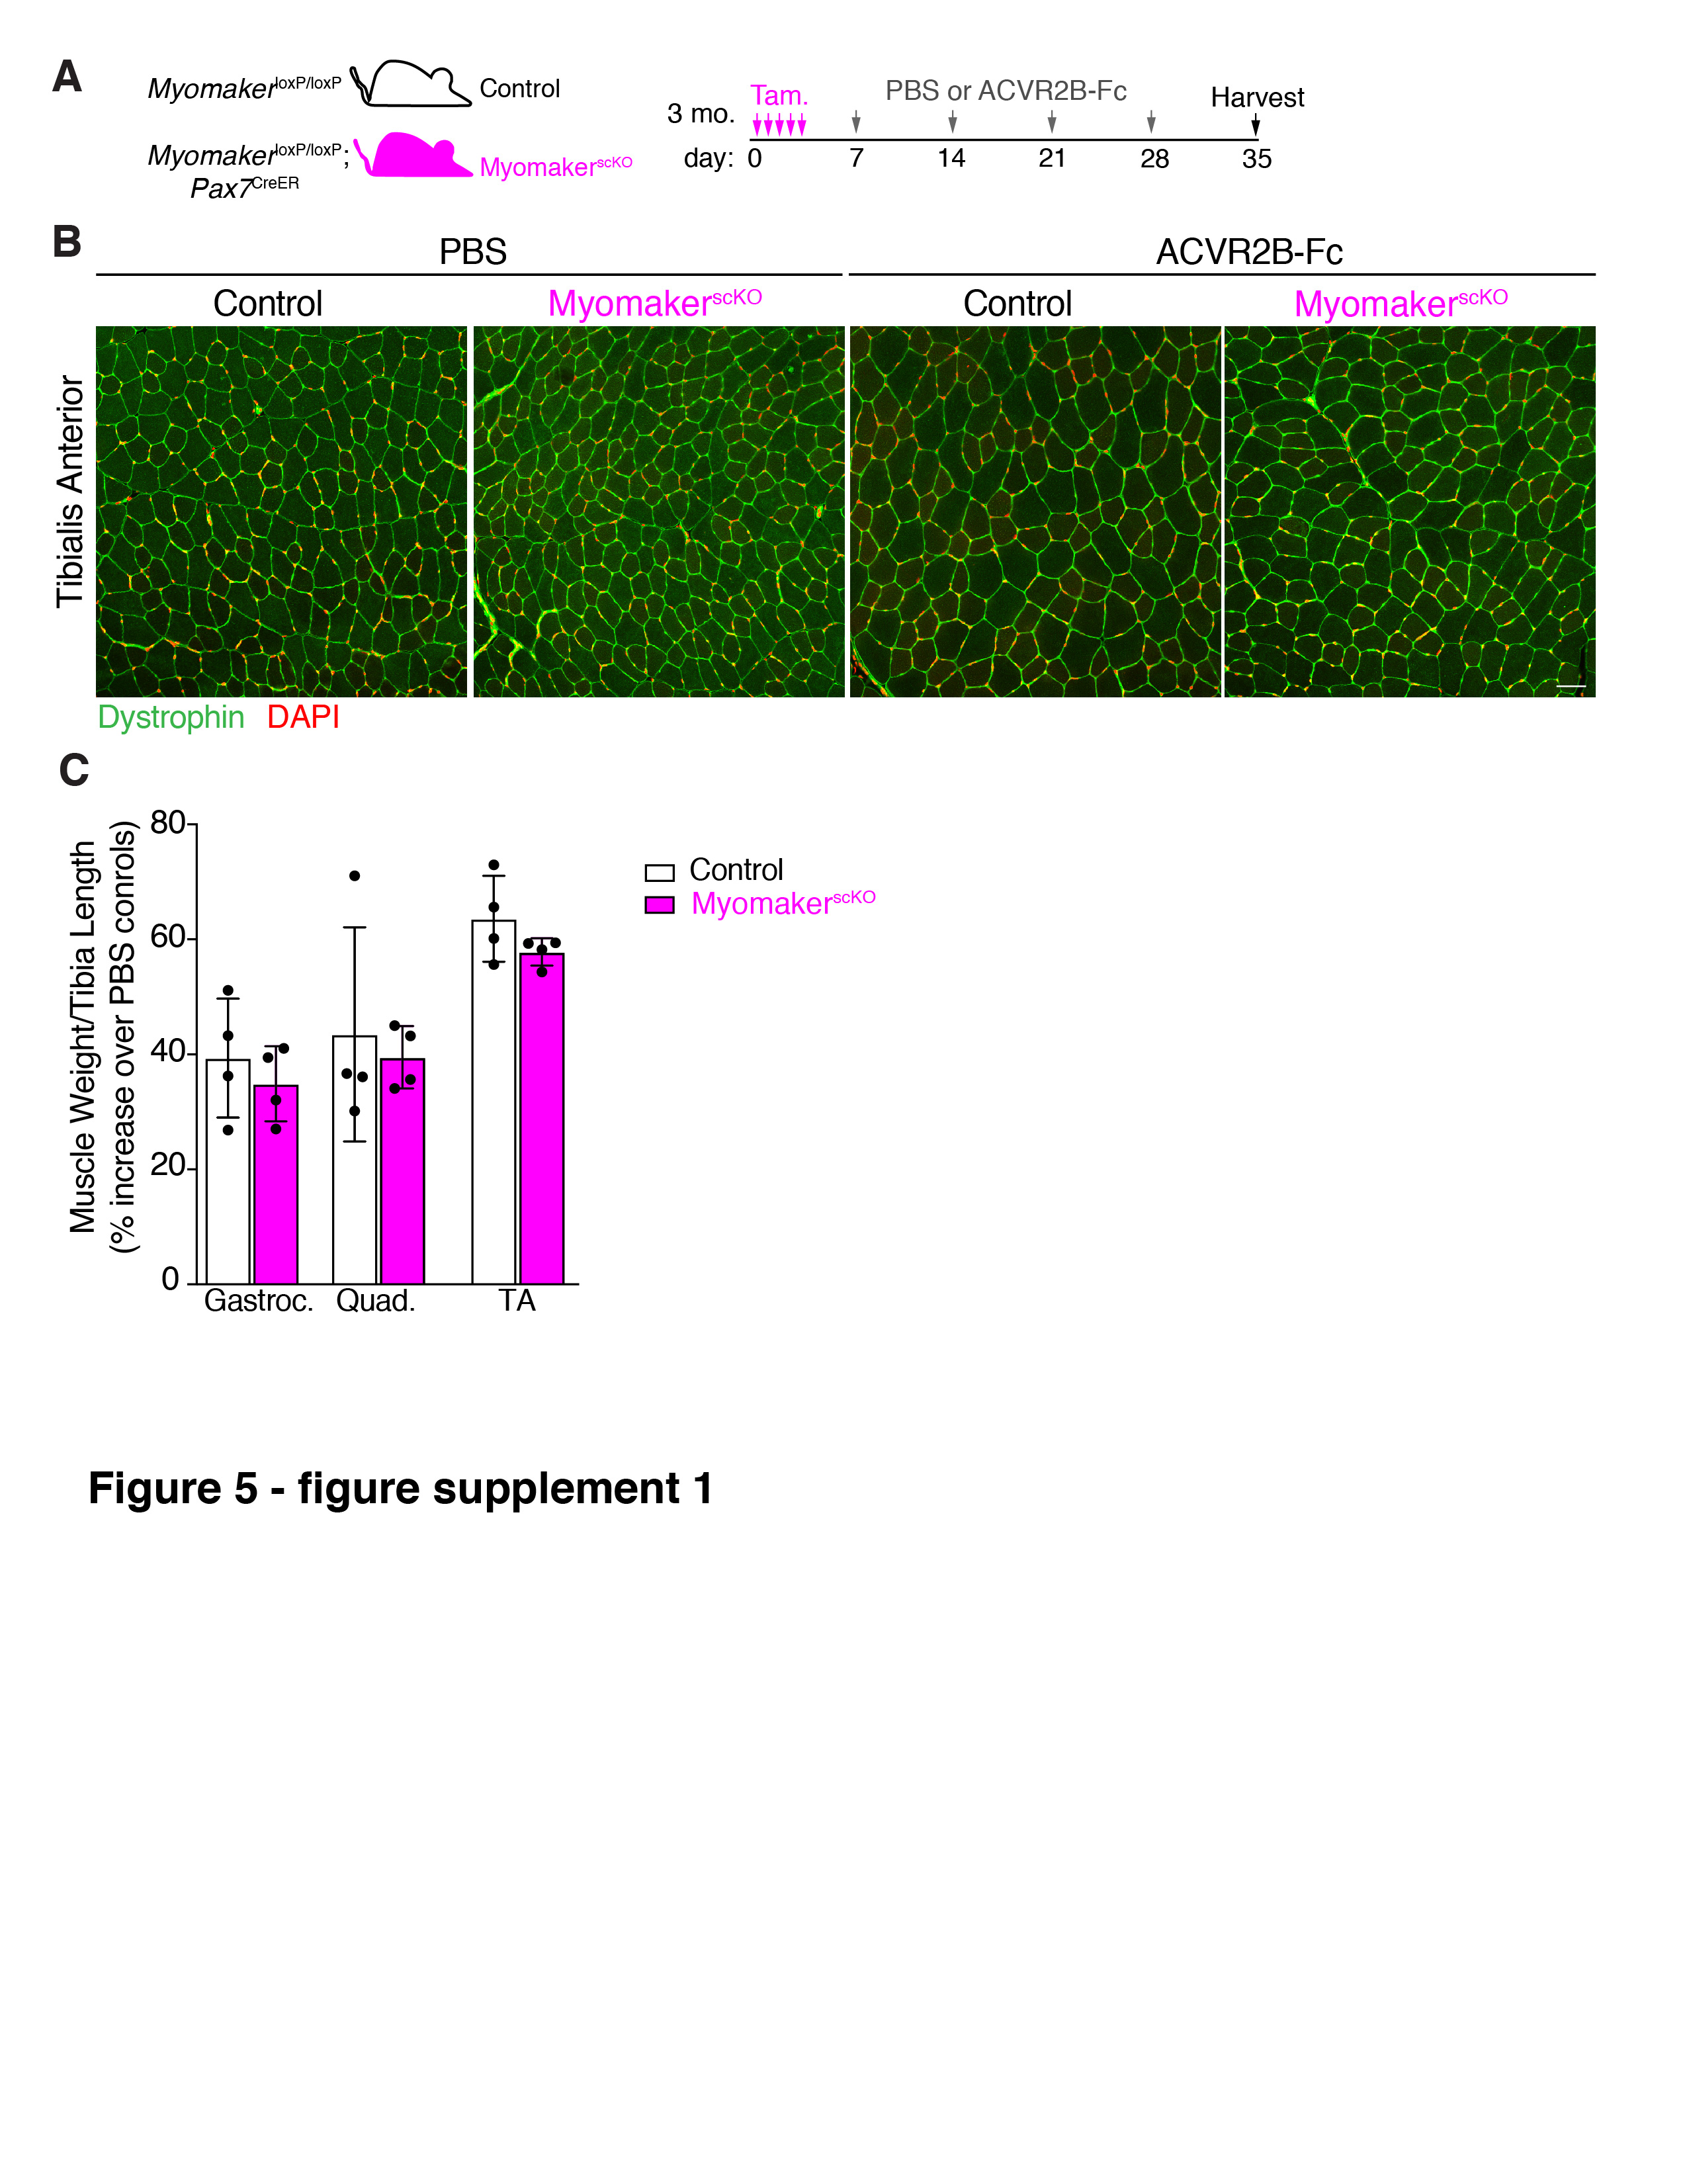

Supplement: supp [file elife-44876-supp-v1.zip › elife_poa_e44876_Figure_5_figure_supplement_1.jpg]
